# Supplementary material for: Histological and Immunohistochemical Characterization of Osteoimmunological Processes in Scaffold-Guided Bone Regeneration in an Ovine Large Segmental Defect Model
Source: MDPI journal article supplement (doi:10.3390/biomedicines11102781), 2023-10-13
Supplement: s1 [file s1]

# Histological and Immunohistochemical Characterization of Osteoimmunological Processes in Scaffold-Guided Bone Regeneration in an Ovine Large Segmental Defect Model

Ronja Finze <sup>1,2,†</sup>, Markus Laubach <sup>1,3,4,†</sup>, Mairim Russo Serafini <sup>5</sup>, Ulrich Kneser <sup>2</sup>, Flavia Medeiros Savi <sup>1,3,6,\*</sup>

## 1 Supplementary Table 1. Details of experimental groups.

Details of experimental groups. mPCL-TCP = medical-grade polycaprolactone and tricalcium phosphate; mPCL-TCP-CaP = medical-grade polycaprolactone and tricalcium phosphate and calcium phosphate surface coating; PRP = Platelet-Rich-Plasma; ICGB = iliac crest bone graft; RIA system = Reamer-Irrigator-Aspirator system; rhBMP-7 = recombinant human bone morphogenic protein-7; CPF = cortico-periosteal flap; Allo-MSC = allogenic mesenchymal stem cells

| Experimental Groups |                                  |                     |                                                                          |
|---------------------|----------------------------------|---------------------|--------------------------------------------------------------------------|
| Scaffold            | Bone Graft Material / Substitute | Tibial Defect Sizes | Time Points                                                              |
| mPCL-TCP            | RIA                              | 6 cm                | 6 hours<br>12 months<br>14 months<br>15 months<br>21 months<br>27 months |
| mPCL-TCP            | ICGB (6 ml)                      | 6 cm                | 2 months<br>6 months                                                     |
| mPCL-TCP            | rhBMP-7 (2 mg) carried in PRP    | 6 cm                | 12 months                                                                |
| mPCL-TCP-CaP        | CPF                              | 3 cm<br>6 cm        | 12 months<br>12 months<br>15 months                                      |
| mPCL-TCP            | Allo-MSC                         | 3 cm                | 36 months                                                                |

## 2 Supplementary Table 2. Antibody markers used for immunohistochemistry.

Verified primary antibody staining to detect inflammatory and blood vessel markers as well as bone ECM proteins in the preclinical critical-sized bone defect model. PK: Proteinase K. ab: abcam; SC: Santa Cruz;

| Antibody                                   | Positive control | Reactivity                           | Raised in | Clonality  | Cat. no.               | Antigen retrieval | Blocking | Dilution | Incubation | DAB      |
|--------------------------------------------|------------------|--------------------------------------|-----------|------------|------------------------|-------------------|----------|----------|------------|----------|
| Inflammation/Osteoclastic activity markers |                  |                                      |           |            |                        |                   |          |          |            |          |
| Nitric oxide synthase (iNOS)               | Sheep spleen     | Mouse                                | Rabbit    | Polyclonal | ab15323                | PK 5 min          | 2% BSA   | 1:100    | 60 min     | 3 min    |
| Mannose receptor (MR)                      | Sheep liver      | Human, Mouse, Rat                    | Rabbit    | Polyclonal | ab64693                | PK 5 min          | 2% BSA   | 1:500    | 60 min     | 45 sec   |
| Arginase-1 (ARG-1)                         | Sheep spleen     | Human, Mouse, Rat                    | Rabbit    | Polyclonal | Proteintech 16001-1-AP | PK 5 min          | 2% BSA   | 1:100    | 60 min     | 5 min    |
| Cluster of differentiation 68 (CD68)       | Sheep spleen     | Mouse, Rat                           | Rabbit    | Polyclonal | ab125212               | PK 5 min          | 2% BSA   | 1:300    | 60 min     | 1:30 min |
| Interferon regulatory factor 5 (IRF5)      | Sheep spleen     | Human, Mouse, Rat, Human, Mouse, Rat | Mouse     | Monoclonal | sc-56714               | PK 5 min          | 2% BSA   | 1:100    | 60 min     | 5 min    |
|                                            |                  |                                      | Rabbit    | Polyclonal | Proteintech 10547-1AP  | PK 5 min          | 2% BSA   | 1:100    | 60 min     | 3 min    |
| Cluster of differentiation (CD3)           | Sheep spleen     | Human                                | Mouse     | Monoclonal | ab17143                | PK 5 min          | 2% BSA   | 1:100    | 60 min     | 5 min    |
| Cluster of differentiation 45 (CD45)       | Sheep spleen     | Human, Mouse, Rat                    | Rabbit    | Polyclonal | ab10558                | PK 5 min          | 2% BSA   | 1:100    | 60 min     | 5 min    |
| Vascularization markers                    |                  |                                      |           |            |                        |                   |          |          |            |          |
| Vascular endothelial growth factor (VEGF)  | Sheep tibia      | Human, Mouse, Rat                    | Rabbit    | Polyclonal | SC152                  | PK 5 min          | 2% BSA   | 1:500    | 60 min     | 1:30 min |

|                                                       |             |                                                                                                                |        |            |               |          |        |              |        |           |
|-------------------------------------------------------|-------------|----------------------------------------------------------------------------------------------------------------|--------|------------|---------------|----------|--------|--------------|--------|-----------|
| Cluster of differentiation 31 (CD31) (PECAM-1 (M-20)) | Sheep tibia | Human, Mouse, Rat                                                                                              | Goat   | Polyclonal | SC1506-R      | PK 5min  | 2% BSA | 1:1000       | 60 min | 1 min     |
| von Willebrand factor (vWF)                           | Sheep tibia | Human                                                                                                          | Rabbit | Polyclonal | IR527         | PK 5min  | 2% BSA | Ready to use | 60 min | 1:30 min  |
| Alpha smooth muscle actin ( $\alpha$ -SMA)            | Heart       | Human, Mouse, Rabbit, Sheep, Pig, Rat,                                                                         | Mouse  | Monoclonal | ab7817        | PK 5 min | 2% BSA | 1:500        | 60 min | 2 min     |
| Angiopoietin-1 (ANG1)                                 | Sheep tibia | Human, Mouse, Rat                                                                                              | Rabbit | Polyclonal | ab102015      | PK 5 min | 2% BSA | 1:100        | 60 min | 1 min     |
| Noggin (NOG)                                          | Sheep tibia | Human, Mouse, Rat                                                                                              | Rabbit | Polyclonal | SC25656       | PK 5 min | 2% BSA | 1:100        | 60 min | 5 min     |
| NOTCH 1                                               | Sheep tibia | Human, Mouse, Rat                                                                                              | Rabbit | Polyclonal | SC6014-R      | PK 5 min | 2% BSA | 1:100        | 60 min | 5 min     |
| Extracellular matrix markers                          |             |                                                                                                                |        |            |               |          |        |              |        |           |
| Collagen type I (COL I)                               | Sheep tibia | Human                                                                                                          | Rabbit | Polyclonal | ab34710       | PK 5min  | 2% BSA | 1:1000       | 60 min | 2 min     |
|                                                       |             | Human                                                                                                          | Rabbit | Monoclonal | ab138492      |          |        | 1:500        |        | 30 sec    |
| Collagen type II (COL II)                             | Sheep tibia | Avian, Bovine, broad species, Chicken, Fish, Goat, Human, Mouse, Ovine, Rabbit, Rat, Shark, Zebrafish, Xenopus | Mouse  | Monoclonal | DSHB II-II6B3 | PK 5min  | 2% BSA | 1:100        | 60 min | 40 sec    |
| Bone morphogenetic protein 2 (BMP2)                   | Sheep tibia | Human, Mouse, Rat,                                                                                             | Mouse  | Monoclonal | SC137087      | PK 5 min | 2% BSA | 1:50         | 60 min | overnight |

|                            |             |                                                   |        |            |            |            |        |       |        |        |
|----------------------------|-------------|---------------------------------------------------|--------|------------|------------|------------|--------|-------|--------|--------|
| Osteoprotegerin (OPG)      | Sheep tibia | Human                                             | Rabbit | Polyclonal | ab73400    | PK 5 min   | 2% BSA | 1:100 | 60 min | 30 sec |
| Alkaline Phosphatase (ALP) | Sheep tibia | Human, Mouse, Rat,                                | Mouse  | Monoclonal | sc166261   | PK 5 min   | 2% BSA | 1:500 | 60 min | 5 min  |
| Sclerostin (SCL)           | Sheep tibia | Human, Mouse, Rat, Sheep,                         | Rabbit | Polyclonal | ab63097    | PK 5 min   | 2% BSA | 1:100 | 60 min | 1 min  |
| Osteomodulin (OMD)         | Sheep tibia | Human, Mouse                                      | Rabbit | Polyclonal | ab154249   | PK 5 min   | 2% BSA | 1:500 | 60 min | 1 min  |
| Osteonectin (ON)           | Sheep tibia | Bovine, Dog, Monkey, Rabbit, Cow, Human, Pig, Rat | Mouse  | Monoclonal | DSHB AON-1 | - PK 5 min | 2% BSA | 1:100 | 60 min | 2 min  |
| Osteopontin (OPN)          | Sheep tibia | Dog, Mouse, Rat, Human, Pig,                      | Rabbit | Polyclonal | ab8448     | PK 5 min   | 2% BSA | 1:100 | 60 min | 40 sec |
| Osteocalcin (OC)           | Sheep tibia | Cow, Goat, Pig, Dog, Human, Rat, Rabbit, Sheep    | Mouse  | Monoclonal | ab13418    | PK 5 min   | 2% BSA | 1:500 | 60 min | 30 sec |

1. **Supplementary figure 1. Schematic overview of the histologic sectioning methodology used in our model of the ovine segmental tibial defect.**

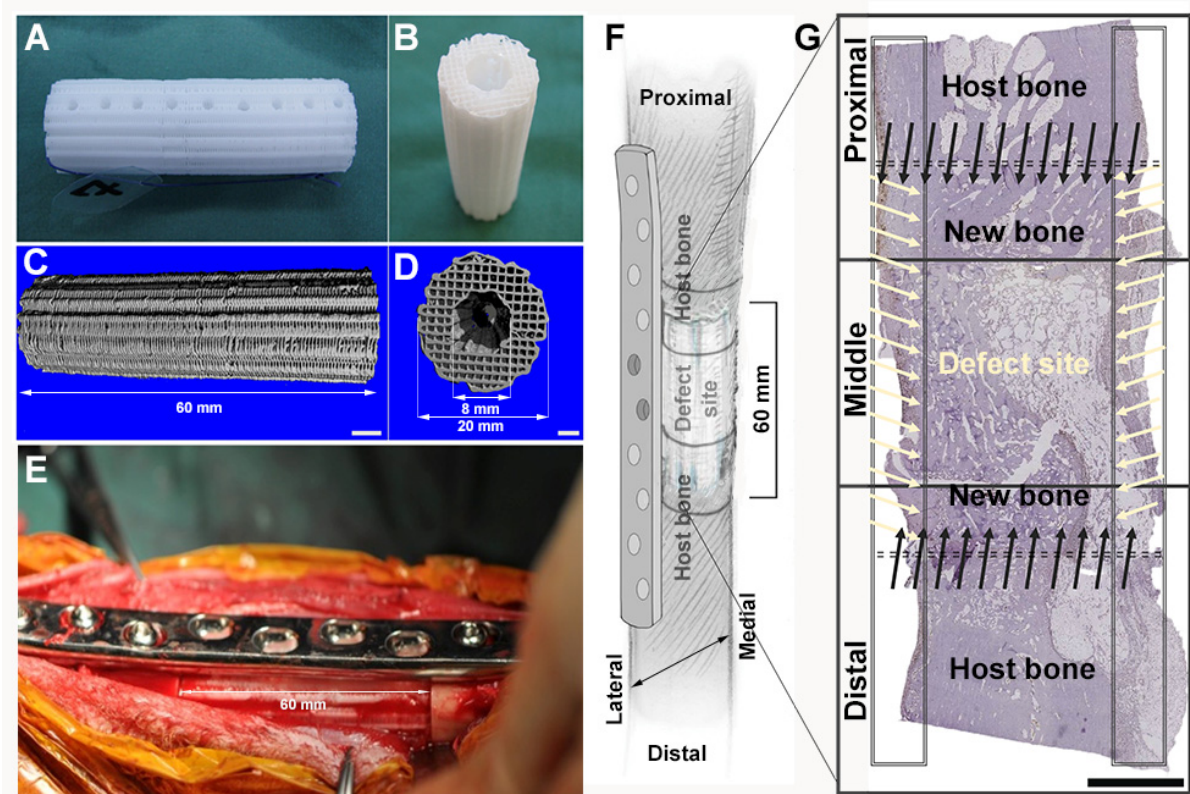

**Supplementary figure 1.** (A-D) Longitudinal and radial view, and dimensions of the mPCL-TCP scaffold. (F-G) Standardized transverse sectioning planes for the immunohistological specimens are proximal host bone and defect site interface, middle: defect site only; distal host bone and defect site interface. Reproduced and modified from Henkel *et al.* [20] and Medeiros Savi *et al.* [78]. Scale bar: 5 mm.

2. **Supplementary figure 2. Immunohistochemical analysis of protein expression in SGBR throughout the entire bone regeneration period, negative controls.**

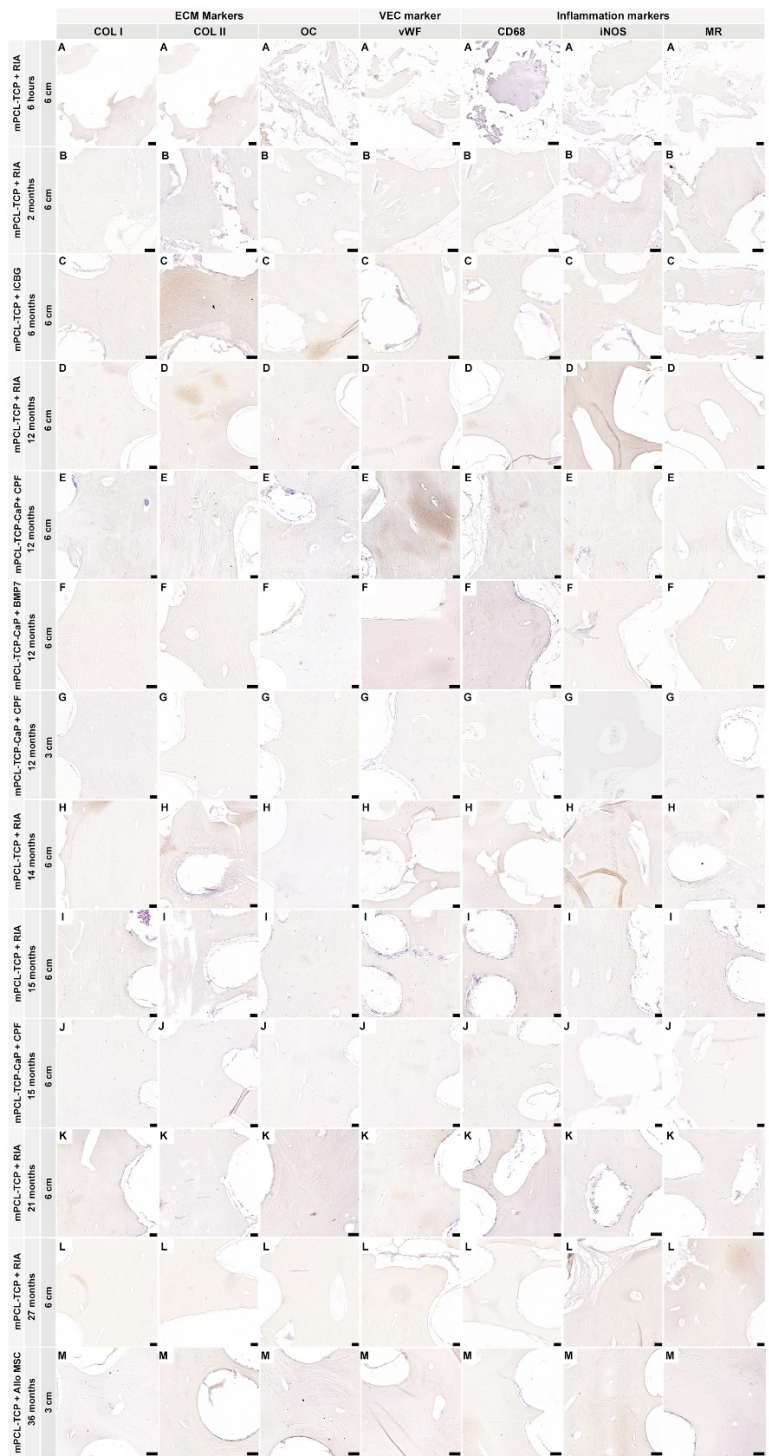

**Supplementary figure 3.** Immunohistochemical analysis of protein expression in SGBR throughout the entire bone regeneration period. Negative controls for Collagen type I (Col I), Collagen type II (Coll II); Osteocalcin (OC); von Willebrand Factor (vWF); cluster of differentiation 68 (CD68); inducible nitric oxidase synthesis (iNOS); Mannose receptor (MR). Scale bars: 50µm



3.     **Supplementary figure 3. Inflammation markers negative controls.**

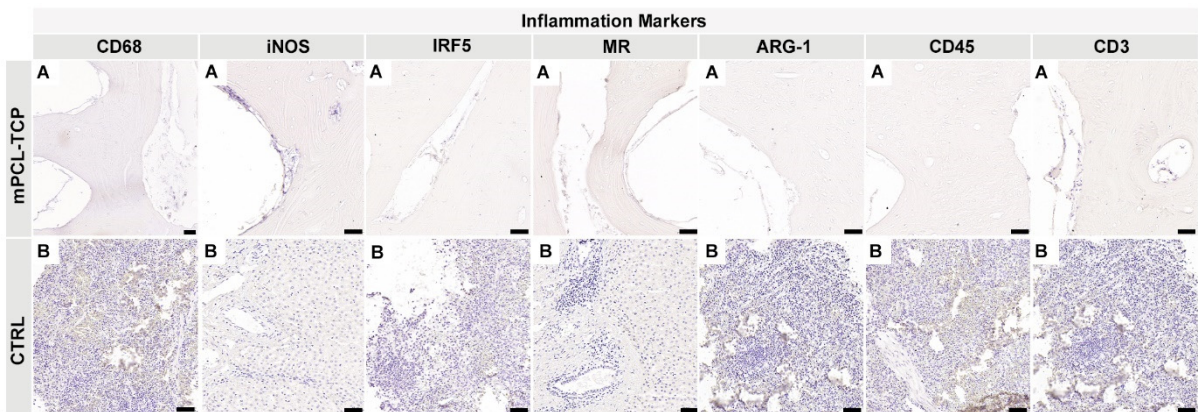

**Supplementary figure 4.** Inflammation markers negative controls for Cluster of differentiation 68 (CD68), Nitric oxide synthase (iNOS), interferon regulatory factor 5 (IRF5), mannose receptor (MR), Arginase-1 (ARG-1), cluster of differentiation 45 (CD45) and cluster of differentiation 3 (CD3). Scale bars: 50µm

4.     **Supplementary Figure 4. Vascular endothelial cellular markers negative controls.**

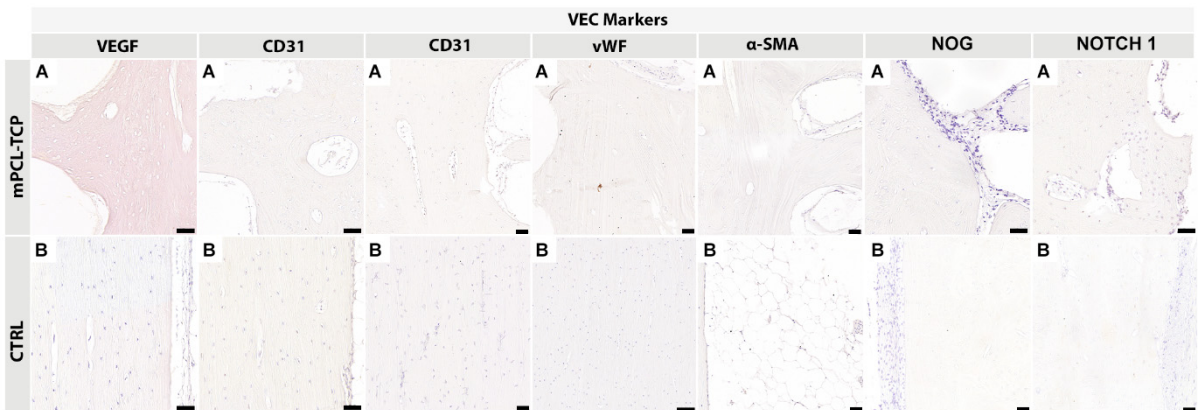

**Supplementary figure 5.** Vascular endothelial cellular markers negative controls for Vascular Endothelial Factor (VEGF); Angiopoietin (ANG1); Cluster of differentiation 31 (CD31); von

Willebrand Factor (vWF); Anti smooth Muscle Actin ( $\alpha$ -SMA); Noggin (NOG). Scale bars: 50 $\mu$ m

5.     **Supplementary figure 5. Extracellular matrix markers negative controls.**

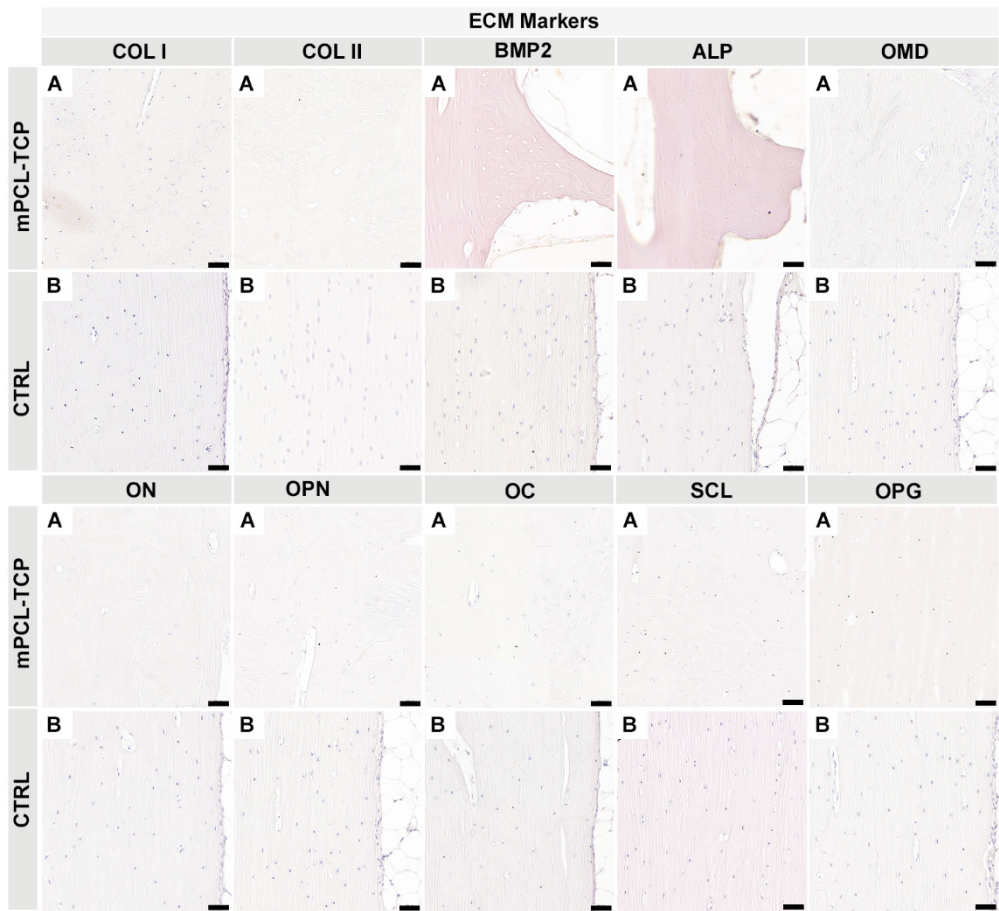

**Supplementary figure 6.** Extracellular matrix markers negative controls for: Collagen type I (Col I), Collagen type II (Coll II); Bone Morphogenic Growth Factor 2 (BMP2); Alkaline Phosphatase (ALP); Osteomodulin (OMD); Osteonectin (ON); Osteopontin (OPN); Osteocalcin (OC); Sclerostin (SCL) and Osteoprotegerin (OPG); Isotypes controls for NOG and NOTCH were used from another tissue sample, however done at the same time. Scale bars: 50 $\mu$ m
